# Supplementary material for: Age and Cohort Trends in Formal Volunteering and Informal Helping in Later Life: Evidence From the Health and Retirement Study
Source: Oxford University Press journal article supplement (doi:10.1215/00703370-10395916), 2022-12-21
Supplement: han_esm.pdf [file han_esm.pdf]

# **Age and Cohort Trends in Formal Volunteering and Informal Helping in Later Life: Evidence from the Health and Retirement Study**

Sae Hwang Han, Yao-Chi Shih, Jeffrey A. Burr, & Changmin Peng

## **Supplementary Materials**

**Figure S1.** Graphical representation of the longitudinal study design

**Figure S2.** Weighted rates of volunteering and informal helping by 10-year birth cohorts

**Table S1.** Descriptive statistics of All Study Variables by 10-year Cohort Membership

**Table S2.** Predicted probabilities of helping behavior participation at select ages

**Table S3.** Multivariate multilevel models predicting volunteering and informal helping:  
Adjustment for education

**Table S4.** Multivariate multilevel models predicting volunteering and informal helping:  
Additional adjustment for family caregiving

**Table S5.** Multivariate multilevel models predicting volunteering and informal helping:  
Gender interaction

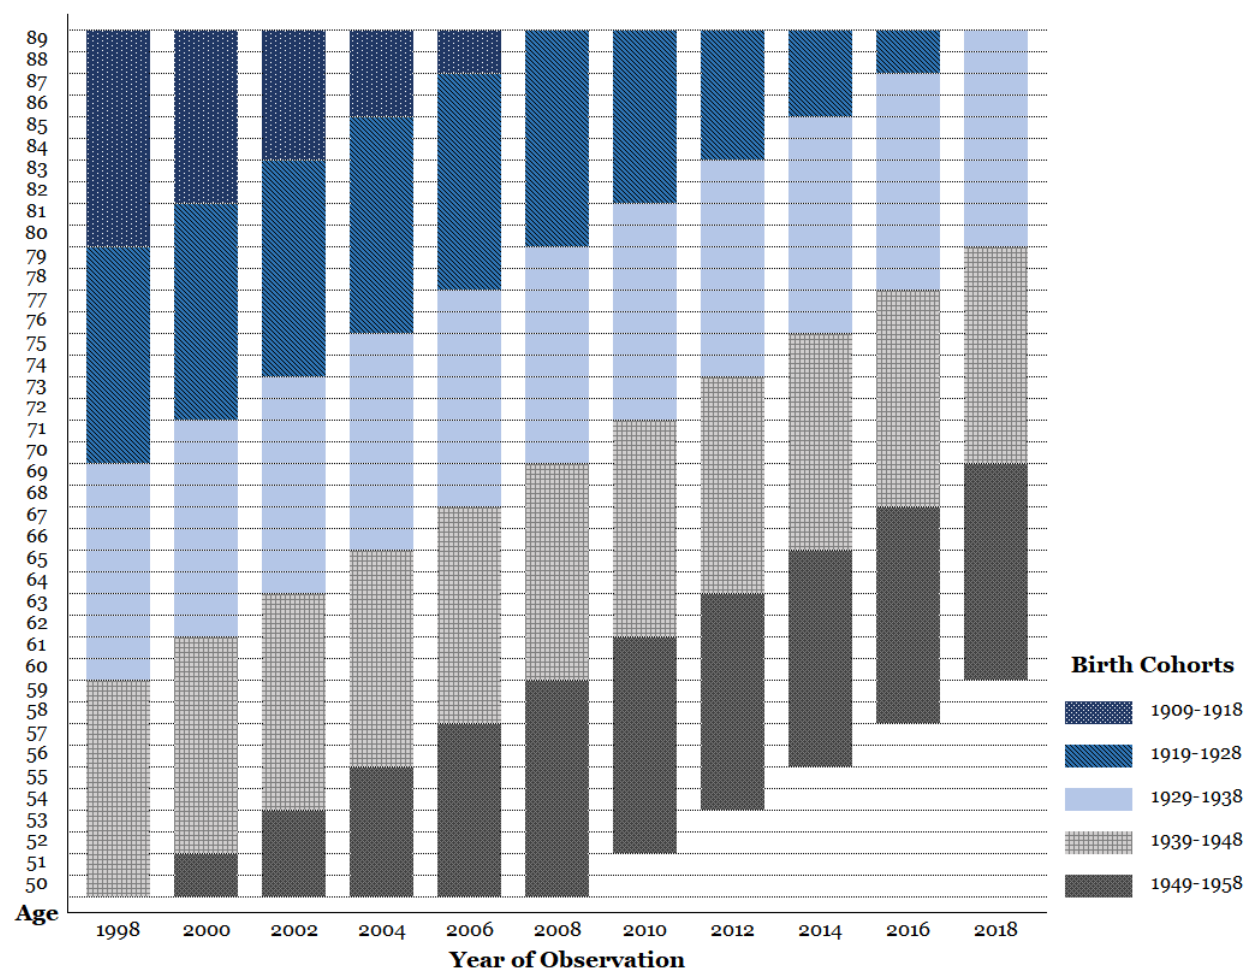

Figure S1. Graphical representation of the longitudinal study design for the five 10-year birth cohorts employed in this study.

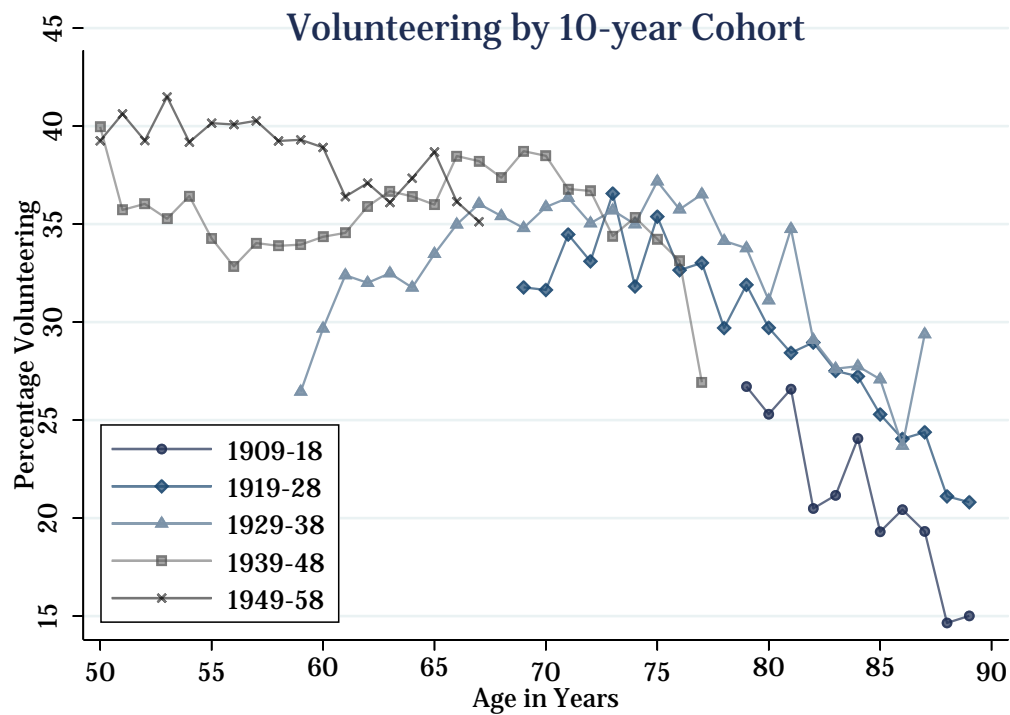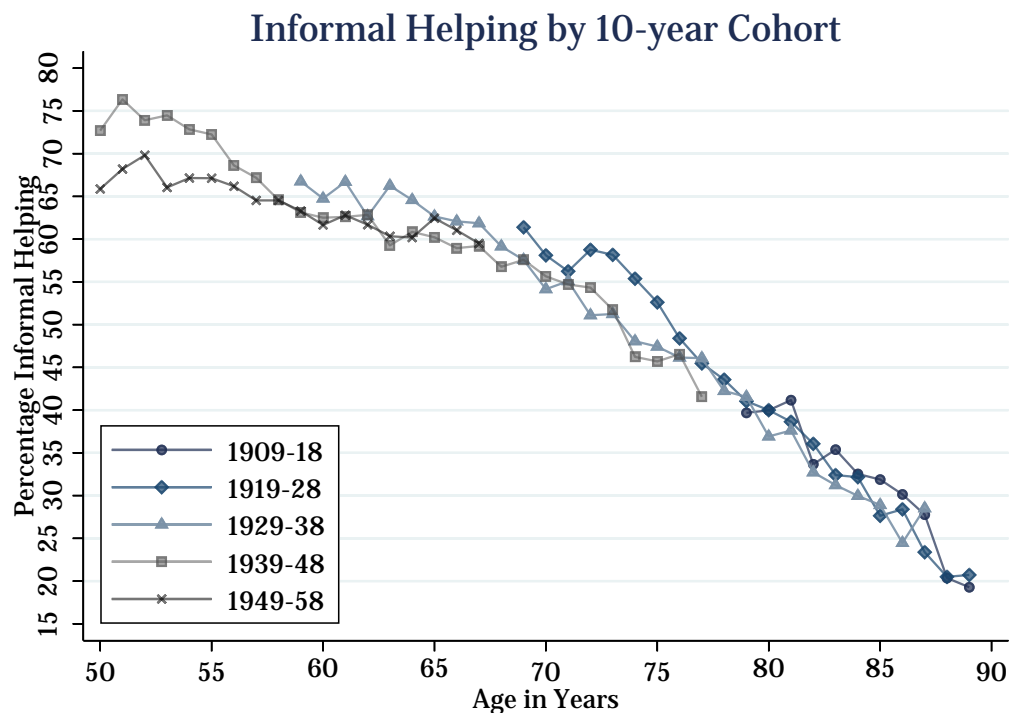

Figure S2. Weighted rates of volunteering and informal helping, respectively, by 10-year birth cohorts based on longitudinal data from the *Health and Retirement Study* (1998-2016). Data from the 2018 wave were not included because survey weights for the wave was not yet available as of this writing (July 2021).

**Table S1***Descriptive Statistics of All Study Variables by 10-year Cohort Membership: Health and Retirement Study 1998-2018*

| <i>Variable</i>          | 1909-1918 |          | 1919-1928 |          | 1929-1938 |           | 1939-1948 |           | 1949-1958 |           |
|--------------------------|-----------|----------|-----------|----------|-----------|-----------|-----------|-----------|-----------|-----------|
|                          | Mean/%    | (SD)     | Mean/%    | (SD)     | Mean/%    | (SD)      | Mean/%    | (SD)      | Mean/%    | (SD)      |
| Volunteering, %          | 19.36     |          | 29.43     |          | 33.55     |           | 35.17     |           | 36.54     |           |
| Informal helping, %      | 30.13     |          | 41.88     |          | 50.63     |           | 58.45     |           | 58.34     |           |
| Age (years)              | 84.58     | (2.86)   | 79.02     | (4.98)   | 71.79     | (6.52)    | 63.89     | (6.53)    | 58.59     | (4.24)    |
| Female, %                | 62.95     |          | 56.97     |          | 55.94     |           | 58.29     |           | 56.65     |           |
| Race/ethnic status, %    |           |          |           |          |           |           |           |           |           |           |
| Non-Hispanic White       | 80.45     |          | 81.68     |          | 74.87     |           | 72.18     |           | 54.54     |           |
| Non-Hispanic Black       | 12.46     |          | 10.17     |          | 14.42     |           | 15.50     |           | 23.41     |           |
| Non-Hispanic other       | 1.47      |          | 1.78      |          | 1.96      |           | 2.49      |           | 4.14      |           |
| Hispanic                 | 5.61      |          | 6.37      |          | 8.75      |           | 9.83      |           | 17.91     |           |
| Coupled, %               | 36.13     |          | 55.51     |          | 64.23     |           | 71.88     |           | 66.49     |           |
| Education in years       | 10.90     | (3.63)   | 11.78     | (3.51)   | 12.16     | (3.27)    | 12.76     | (3.07)    | 12.98     | (3.25)    |
| Wealth (in \$1,000)      | 278.39    | (879.89) | 361.53    | (881.76) | 400.31    | (1237.27) | 387.89    | (1241.47) | 309.87    | (1552.10) |
| Working for pay, %       | 4.04      |          | 10.04     |          | 23.65     |           | 45.22     |           | 61.28     |           |
| Religious, %             | 66.50     |          | 66.98     |          | 66.38     |           | 61.45     |           | 65.24     |           |
| ADL limitations          | 0.70      | (1.25)   | 0.45      | (1.04)   | 0.33      | (0.90)    | 0.25      | (0.78)    | 0.28      | (0.82)    |
| Family caregiving, %     | 5.66      |          | 7.98      |          | 11.17     |           | 15.78     |           | 19.30     |           |
| Attrition, %             | 2.08      |          | 3.39      |          | 3.91      |           | 4.43      |           | 1.98      |           |
| Person-wave observations | 6,307     |          | 26,123    |          | 54,266    |           | 54,201    |           | 39,568    |           |

*Notes.*  $N = 180,465$  person-wave observations. ADL = activities of daily living.

**Table S2**

*Predicted Probabilities of Helping Behavior Participation at Select Ages along with Ratios of Probabilities for Adjacent Cohorts*

|                  |            | Cohorts |                                          |                                          |                                          |                                          |                    |
|------------------|------------|---------|------------------------------------------|------------------------------------------|------------------------------------------|------------------------------------------|--------------------|
|                  |            | Age     | 1949-1958                                | 1939-1948                                | 1929-1938                                | 1919-1928                                | 1909-1918          |
| Volunteering     | Unadjusted | 55      | .385 [0.375,0.393]<br>v.1939-1948: 1.164 | .331 [0.322,0.340]                       |                                          |                                          |                    |
|                  |            | 65      | .345 [0.335,0.357]<br>v.1939-1948: 1.002 | .345 [0.337,0.353]<br>v.1929-1938: 1.058 | .326 [0.315,0.334]                       |                                          |                    |
|                  |            | 75      |                                          | .297 [0.284,0.310]<br>v.1929-1938: 0.967 | .307 [0.298,0.314]<br>v.1919-1928: 1.014 | .303 [0.292,0.313]                       |                    |
|                  |            | 85      |                                          |                                          | .161 [0.148,0.173]<br>v.1919-1928: 0.933 | .172 [0.162,0.183]<br>v.1909-1918: 1.019 | .169 [0.154,0.191] |
|                  |            |         |                                          |                                          |                                          |                                          |                    |
|                  | Adjusted   | 55      | .338 [0.328,0.348]<br>v.1939-1948: 1.183 | .286 [0.275,0.298]                       |                                          |                                          |                    |
|                  |            | 65      | .286 [0.273,0.299]<br>v.1939-1948: 0.883 | .324 [0.314,0.335]<br>v.1929-1938: 1.044 | .310[0.301, 0.319]                       |                                          |                    |
|                  |            | 75      |                                          | .248 [0.233,0.266]<br>v.1929-1938: 0.816 | .304[0.295, 0.313]<br>v.1919-1928: .953  | .319[0.307, 0.333]                       |                    |
|                  |            | 85      |                                          |                                          | .116[0.105, 0.127]<br>v.1919-1928: 0.670 | .173[0.162, 0.185]<br>v.1909-1918: 0.797 | .217[0.204, 0.235] |
|                  |            |         |                                          |                                          |                                          |                                          |                    |
| Informal helping | Unadjusted | 55      | .636 [0.629,0.644]<br>v.1939-1948: .951  | .669 [0.660,0.677]                       |                                          |                                          |                    |
|                  |            | 65      | .558 [0.547,0.570]<br>v.1939-1948: 1.000 | .559 [0.551,0.567]<br>v.1929-1938: .934  | .598 [0.590,0.606]                       |                                          |                    |
|                  |            | 75      |                                          | .413 [0.401,0.426]<br>v.1929-1938: 0.992 | .417 [0.408,0.425]<br>v.1919-1928: 0.861 | .484 [0.474,0.494]                       |                    |
|                  |            | 85      |                                          |                                          | .163 [0.408,0.425]<br>v.1919-1928: 0.825 | .198 [0.474,0.494]<br>v.1909-1918: 0.704 | .281[0.269, 0.293] |
|                  |            |         |                                          |                                          |                                          |                                          |                    |

|          |    |                                          |                                          |                                          |                                          |                    |
|----------|----|------------------------------------------|------------------------------------------|------------------------------------------|------------------------------------------|--------------------|
| Adjusted | 55 | .616 [0.607,0.624]<br>v.1939-1948: 0.917 | .672 [0.658,0.683]                       |                                          |                                          |                    |
|          | 65 | .534 [0.522,0.547]<br>v.1939-1948: 0.967 | .553 [0.544,0.562]<br>v.1929-1938: 0.906 | .611 [0.602,0.620]                       |                                          |                    |
|          | 75 |                                          | .407 [0.391,0.423]<br>v.1929-1938: 0.949 | .429 [0.420,0.438]<br>v.1919-1928: 0.840 | .511 [0.499,0.524]                       |                    |
|          | 85 |                                          |                                          | .162 [0.147,0.179]<br>v.1919-1928: 0.734 | .220 [0.209,0.233]<br>v.1909-1918: 0.668 | .330 [0.315,0.342] |
|          |    |                                          |                                          |                                          |                                          |                    |

*Notes.* Predicted probabilities are based on coefficients from the unadjusted and adjusted multivariate models presented in Table 2; 95% credible intervals are presented in brackets. Ratios comparing helping behavior participation probabilities for adjacent cohorts at a given age are presented in grey shade.

Table S3

Multivariate Multilevel Models Predicting Volunteering and Informal Helping: Adjustment for Education

|                                                  | Unadjusted (copied from Table 2) |                        |                         |                        | Unadjusted + Education |                        |                         |                        |
|--------------------------------------------------|----------------------------------|------------------------|-------------------------|------------------------|------------------------|------------------------|-------------------------|------------------------|
|                                                  | <u>Volunteering</u>              |                        | <u>Informal helping</u> |                        | <u>Volunteering</u>    |                        | <u>Informal helping</u> |                        |
|                                                  | $\beta$                          | [95% CI]               | $\beta$                 | [95% CI]               | $\beta$                | [95% CI]               | $\beta$                 | [95% CI]               |
| <b>Fixed effects</b>                             |                                  |                        |                         |                        |                        |                        |                         |                        |
| Age linear                                       | -0.120                           | <b>[-0.139,-0.107]</b> | -0.112                  | <b>[-0.121,0.000]</b>  | -0.127                 | <b>[-0.144,-0.117]</b> | -0.117                  | <b>[-0.133,0.000]</b>  |
| Age quadratic <sup>a</sup>                       | 0.091                            | [-0.020,0.182]         | -0.747                  | <b>[-0.835,-0.586]</b> | -0.430                 | <b>[-0.520,-0.340]</b> | -0.802                  | <b>[-0.995,-0.578]</b> |
| Age cubic <sup>b</sup>                           | -0.096                           | <b>[-0.124,-0.068]</b> | -0.049                  | <b>[-0.079,-0.023]</b> | -0.151                 | <b>[-0.179,-0.121]</b> | -0.092                  | <b>[-0.129,-0.043]</b> |
| 10-year cohort                                   |                                  |                        |                         |                        |                        |                        |                         |                        |
| 1919-1928                                        | 0.637                            | <b>[0.467,0.765]</b>   | 0.373                   | <b>[0.308,0.437]</b>   | 0.564                  | <b>[0.379,0.691]</b>   | 0.320                   | <b>[0.241,0.394]</b>   |
| 1929-1938                                        | 0.995                            | <b>[0.796,1.124]</b>   | 0.812                   | <b>[0.756,0.876]</b>   | 0.836                  | <b>[0.681,0.962]</b>   | 0.718                   | <b>[0.643,0.791]</b>   |
| 1939-1948                                        | 1.086                            | <b>[0.898,1.210]</b>   | 1.061                   | <b>[1.010,1.107]</b>   | 0.780                  | <b>[0.600,0.907]</b>   | 0.894                   | <b>[0.824,0.967]</b>   |
| 1949-1958                                        | 1.225                            | <b>[1.043,1.350]</b>   | 1.216                   | <b>[1.162,1.274]</b>   | 0.765                  | <b>[0.582,0.870]</b>   | 0.976                   | <b>[0.910,1.059]</b>   |
| Age linear by cohort interaction                 |                                  |                        |                         |                        |                        |                        |                         |                        |
| × 1919-1928                                      | 0.047                            | <b>[0.034,0.065]</b>   | 0.005                   | [-0.003,0.014]         | 0.041                  | <b>[0.026,0.059]</b>   | 0.007                   | [-0.003,0.022]         |
| × 1929-1938                                      | 0.106                            | <b>[0.093,0.125]</b>   | 0.046                   | <b>[0.038,0.054]</b>   | 0.111                  | <b>[0.098,0.127]</b>   | 0.050                   | <b>[0.040,0.064]</b>   |
| × 1939-1948                                      | 0.123                            | <b>[0.110,0.143]</b>   | 0.072                   | <b>[0.063,0.081]</b>   | 0.132                  | <b>[0.122,0.148]</b>   | 0.078                   | <b>[0.067,0.093]</b>   |
| × 1949-1958                                      | 0.100                            | <b>[0.086,0.119]</b>   | 0.085                   | <b>[0.076,0.095]</b>   | 0.102                  | <b>[0.091,0.120]</b>   | 0.089                   | <b>[0.078,0.104]</b>   |
| Age quadratic by cohort interaction <sup>a</sup> |                                  |                        |                         |                        |                        |                        |                         |                        |
| × 1919-1928                                      | -0.531                           | <b>[-0.661,-0.391]</b> | 0.469                   | <b>[0.302,0.583]</b>   | -0.293                 | <b>[-0.441,-0.138]</b> | 0.478                   | <b>[0.261,0.691]</b>   |
| × 1929-1938                                      | -0.400                           | <b>[-0.490,-0.311]</b> | 0.585                   | <b>[0.427,0.680]</b>   | -0.089                 | [-0.199,0.016]         | 0.626                   | <b>[0.401,0.821]</b>   |
| × 1939-1948                                      | -0.231                           | <b>[-0.316,-0.131]</b> | 0.707                   | <b>[0.544,0.802]</b>   | 0.128                  | <b>[0.035,0.216]</b>   | 0.771                   | <b>[0.526,0.976]</b>   |
| × 1949-1958                                      | -0.011                           | [-0.141,0.116]         | 0.772                   | <b>[0.590,0.900]</b>   | 0.426                  | <b>[0.303,0.564]</b>   | 0.849                   | <b>[0.574,1.075]</b>   |
| Covariates                                       |                                  |                        |                         |                        |                        |                        |                         |                        |
| Female                                           | 0.162                            | <b>[0.126,0.209]</b>   | -0.326                  | <b>[-0.354,-0.299]</b> | 0.218                  | <b>[0.181,0.255]</b>   | -0.323                  | <b>[-0.348,-0.302]</b> |
| Race/ethnicity                                   |                                  |                        |                         |                        |                        |                        |                         |                        |
| Non-Hispanic black                               | -0.151                           | <b>[-0.197,-0.105]</b> | -0.404                  | <b>[-0.434,-0.372]</b> | 0.161                  | <b>[0.104,0.232]</b>   | -0.265                  | <b>[-0.300,-0.223]</b> |
| Non-Hispanic other                               | -0.360                           | <b>[-0.488,-0.194]</b> | -0.399                  | <b>[-0.479,-0.308]</b> | -0.273                 | [-0.393,-0.121]        | -0.337                  | <b>[-0.419,-0.255]</b> |
| Hispanic                                         | -1.028                           | <b>[-1.088,-0.961]</b> | -1.083                  | <b>[-1.127,-1.041]</b> | -0.286                 | <b>[-0.344,-0.204]</b> | -0.708                  | <b>[-0.758,-0.647]</b> |
| Education in years                               |                                  |                        |                         |                        | 0.216                  | <b>[0.206,0.223]</b>   | 0.099                   | <b>[0.093,0.104]</b>   |
| Attrition                                        | -0.105                           | <b>[-0.199,-0.025]</b> | 0.009                   | [-0.049,0.067]         | -0.182                 | <b>[-0.287,-0.083]</b> | -0.023                  | [-0.083,0.034]         |

|                                |         |                        |        |                        |        |                        |        |                        |
|--------------------------------|---------|------------------------|--------|------------------------|--------|------------------------|--------|------------------------|
| Intercept                      | -1.812  | <b>[-1.928,-1.639]</b> | -0.438 | <b>[-0.496,-0.385]</b> | -1.864 | <b>[-1.977,-1.690]</b> | -0.394 | <b>[-0.462,-0.328]</b> |
| <b>Selected random effects</b> |         |                        |        |                        |        |                        |        |                        |
| Intercept                      | 2.787   | <b>[2.686,2.889]</b>   | 0.968  | <b>[0.936,0.998]</b>   | 3.052  | <b>[2.956,3.159]</b>   | 0.930  | <b>[0.874,0.975]</b>   |
| Cov (volunteering, helping)    | 0.973   | <b>[0.935,1.009]</b>   |        |                        | 0.979  | <b>[0.874,0.961]</b>   |        |                        |
| Age                            | 0.001   | <b>[0.000,0.002]</b>   | 0.001  | <b>[0.000,0.001]</b>   | 0.013  | <b>[0.011,0.014]</b>   | 0.003  | <b>[0.001,0.005]</b>   |
| Cov (volunteering, helping)    | -0.0002 | [-0.0004,0.00001]      |        |                        | 0.003  | <b>[0.002,0.003]</b>   |        |                        |
| Intercept-slope covariance     | 0.017   | <b>[0.013,0.024]</b>   | 0.014  | <b>[0.011,0.018]</b>   | 0.029  | <b>[0.022,0.036]</b>   | 0.014  | <b>[0.012,0.017]</b>   |

*Notes.* Sample  $N = 29,816$  (180,465 person-wave observations). Posterior means for the coefficients and 95% Bayesian credible intervals (CIs). CIs are based on the 2.5th and 97.5th quantiles of the posterior distribution; Bayesian CIs that do not contain zero are **bolded**. HRS = *Health and Retirement Study*. CI = Credible intervals. <sup>a</sup> Estimates multiplied by 100 to reduce leading zeros. <sup>b</sup> Estimates multiplied by 1000 to reduce leading zeros.



Table S4

*Multivariate Multilevel Models Predicting Volunteering and Informal Helping: Additional Adjustment for **Family Caregiving***

|                                                  | Adjusted (copied from Table 2) |                        |                  |                        | Adjusted + Family Caregiving |                        |                  |                        |
|--------------------------------------------------|--------------------------------|------------------------|------------------|------------------------|------------------------------|------------------------|------------------|------------------------|
|                                                  | Volunteering                   |                        | Informal helping |                        | Volunteering                 |                        | Informal helping |                        |
|                                                  | $\beta$                        | [95% CI]               | $\beta$          | [95% CI]               | $\beta$                      | [95% CI]               | $\beta$          | [95% CI]               |
| <b>Fixed effects</b>                             |                                |                        |                  |                        |                              |                        |                  |                        |
| Age linear                                       | -0.101                         | <b>[-0.115,-0.081]</b> | -0.104           | <b>[-0.113,-0.092]</b> | -0.093                       | <b>[-0.110,-0.076]</b> | -0.106           | <b>[-0.116,-0.095]</b> |
| Age quadratic <sup>a</sup>                       | -0.205                         | <b>[-0.321,-0.093]</b> | -0.401           | <b>[-0.467,-0.328]</b> | -0.451                       | <b>[-0.652,-0.281]</b> | -0.725           | <b>[-0.876,-0.619]</b> |
| Age cubic <sup>b</sup>                           | -0.148                         | <b>[-0.177,-0.116]</b> | -0.092           | <b>[-0.128,-0.053]</b> | -0.139                       | <b>[-0.173,-0.099]</b> | -0.091           | <b>[-0.127,-0.045]</b> |
| 10-year cohort                                   |                                |                        |                  |                        |                              |                        |                  |                        |
| 1919-1928                                        | 0.387                          | <b>[0.238,0.510]</b>   | 0.269            | <b>[-0.128,-0.053]</b> | 0.355                        | <b>[0.270,0.475]</b>   | 0.225            | <b>[-0.127,-0.045]</b> |
| 1929-1938                                        | 0.628                          | <b>[0.486,0.741]</b>   | 0.633            | <b>[0.586,0.713]</b>   | 0.606                        | <b>[0.549,0.695]</b>   | 0.591            | <b>[0.544,0.637]</b>   |
| 1939-1948                                        | 0.609                          | <b>[0.465,0.718]</b>   | 0.815            | <b>[0.764,0.888]</b>   | 0.596                        | <b>[0.530,0.672]</b>   | 0.764            | <b>[0.717,0.813]</b>   |
| 1949-1958                                        | 0.615                          | <b>[0.503,0.713]</b>   | 0.912            | <b>[0.861,0.978]</b>   | 0.608                        | <b>[0.532,0.699]</b>   | 0.856            | <b>[0.803,0.901]</b>   |
| Age linear by cohort interaction                 |                                |                        |                  |                        |                              |                        |                  |                        |
| × 1919-1928                                      | 0.026                          | <b>[0.006,0.042]</b>   | 0.003            | [-0.008,0.012]         | 0.017                        | [-0.005,0.037]         | 0.006            | [-0.005,0.017]         |
| × 1929-1938                                      | 0.091                          | <b>[0.069,0.105]</b>   | 0.042            | <b>[0.031,0.050]</b>   | 0.082                        | <b>[0.064,0.100]</b>   | 0.045            | <b>[0.033,0.055]</b>   |
| × 1939-1948                                      | 0.109                          | <b>[0.086,0.123]</b>   | 0.068            | <b>[0.056,0.077]</b>   | 0.100                        | <b>[0.083,0.117]</b>   | 0.071            | <b>[0.058,0.082]</b>   |
| × 1949-1958                                      | 0.077                          | <b>[0.056,0.092]</b>   | 0.078            | <b>[0.065,0.087]</b>   | 0.069                        | <b>[0.050,0.087]</b>   | 0.081            | <b>[0.068,0.093]</b>   |
| Age quadratic by cohort interaction <sup>a</sup> |                                |                        |                  |                        |                              |                        |                  |                        |
| × 1919-1928                                      | -0.422                         | <b>[-0.574,-0.256]</b> | 0.131            | <b>[0.016,0.243]</b>   | -0.171                       | [-0.380,0.053]         | 0.460            | <b>[0.322,0.626]</b>   |
| × 1929-1938                                      | -0.262                         | <b>[-0.382,-0.134]</b> | 0.264            | <b>[0.181,0.335]</b>   | -0.019                       | [-0.180,0.193]         | 0.582            | <b>[0.456,0.743]</b>   |
| × 1939-1948                                      | -0.067                         | [-0.190,0.054]         | 0.387            | <b>[0.305,0.466]</b>   | 0.177                        | <b>[0.018,0.383]</b>   | 0.716            | <b>[0.576,0.874]</b>   |
| × 1949-1958                                      | 0.208                          | <b>[0.045,0.361]</b>   | 0.444            | <b>[0.339,0.560]</b>   | 0.444                        | <b>[0.249,0.680]</b>   | 0.774            | <b>[0.613,0.945]</b>   |
| Covariates                                       |                                |                        |                  |                        |                              |                        |                  |                        |
| Female                                           | 0.085                          | [-0.399,0.125]         | -0.345           | <b>[-0.377,-0.318]</b> | 0.082                        | [-0.426,0.121]         | -0.352           | [-0.378,-0.320]        |
| Race/ethnicity                                   |                                |                        |                  |                        |                              |                        |                  |                        |
| Non-Hispanic black                               | 0.019                          | [-0.058,0.096]         | -0.232           | <b>[-0.267,-0.196]</b> | -0.003                       | [-0.058,0.053]         | -0.242           | <b>[-0.283,-0.205]</b> |
| Non-Hispanic other                               | -0.284                         | <b>[-0.389,-0.174]</b> | -0.315           | <b>[-0.390,-0.227]</b> | -0.306                       | <b>[-0.435,-0.151]</b> | -0.321           | <b>[-0.398,-0.244]</b> |
| Hispanic                                         | -0.310                         | <b>[-0.399,-0.229]</b> | -0.232           | <b>[-0.267,-0.196]</b> | -0.349                       | <b>[-0.426,-0.272]</b> | -0.242           | <b>[-0.283,-0.205]</b> |
| Coupled                                          | 0.073                          | <b>[0.046,0.102]</b>   | -0.032           | <b>[-0.053,-0.010]</b> | 0.062                        | <b>[0.031,0.101]</b>   | -0.050           | <b>[-0.076,-0.028]</b> |
| Education in years                               | 0.204                          | <b>[0.193,0.212]</b>   | 0.086            | <b>[0.081,0.091]</b>   | 0.204                        | <b>[0.197,0.211]</b>   | 0.086            | <b>[0.081,0.091]</b>   |

|                                |        |                        |        |                        |        |                        |        |                        |
|--------------------------------|--------|------------------------|--------|------------------------|--------|------------------------|--------|------------------------|
| Household wealth <sup>c</sup>  | 0.042  | <b>[0.037,0.048]</b>   | 0.028  | <b>[0.024,0.033]</b>   | 0.041  | <b>[0.034,0.048]</b>   | 0.028  | <b>[0.023,0.033]</b>   |
| Working for pay                | 0.045  | <b>[0.015,0.073]</b>   | 0.041  | <b>[0.021,0.065]</b>   | 0.034  | <b>[0.007,0.069]</b>   | 0.044  | <b>[0.023,0.067]</b>   |
| Religious                      | 1.093  | <b>[1.057,1.135]</b>   | 0.228  | <b>[0.201,0.258]</b>   | 1.082  | <b>[1.043,1.129]</b>   | 0.228  | <b>[0.201,0.263]</b>   |
| ADL limitations <sup>d</sup>   | -0.251 | <b>[-0.267,-0.236]</b> | -0.255 | <b>[-0.266,-0.243]</b> | -0.249 | <b>[-0.269,-0.232]</b> | -0.254 | <b>[-0.267,-0.242]</b> |
| Family caregiving <sup>e</sup> |        |                        |        |                        | -0.023 | [-0.058,0.008]         | 0.138  | <b>[0.113,0.163]</b>   |
| Attrition                      | -0.199 | <b>[-0.304,-0.100]</b> | -0.054 | [-0.113,0.005]         | -0.187 | <b>[-0.297,-0.085]</b> | -0.049 | [-0.110,0.011]         |
| Intercept                      | -2.468 | <b>[-2.551,-2.319]</b> | -0.516 | <b>[-0.568,-0.444]</b> | -2.408 | <b>[-2.494,-2.333]</b> | 0.138  | <b>[0.113,0.163]</b>   |
| <b>Selected random effects</b> |        |                        |        |                        |        |                        |        |                        |
| Intercept                      | 2.600  | <b>[2.513,2.702]</b>   | 0.838  | <b>[0.792,0.871]</b>   | 2.586  | <b>[2.514,2.608]</b>   | 0.832  | <b>[0.788,0.866]</b>   |
| Cov (volunteering, helping)    | 0.750  | <b>[0.718,0.786]</b>   |        |                        | 0.746  | <b>[0.715,0.786]</b>   |        |                        |
| Age                            | 0.012  | <b>[0.011,0.013]</b>   | 0.003  | <b>[0.001,0.004]</b>   | 0.012  | <b>[0.011,0.013]</b>   | 0.003  | <b>[0.001,0.004]</b>   |
| Cov (volunteering, helping)    | 0.003  | <b>[0.002,0.003]</b>   |        |                        | 0.003  | <b>[0.002,0.003]</b>   |        |                        |
| Intercept-slope covariance     | 0.030  | <b>[0.023,0.039]</b>   | 0.013  | <b>[0.011,0.015]</b>   | 0.030  | <b>[0.022,0.037]</b>   | 0.013  | <b>[0.011,0.015]</b>   |

Notes. Sample  $N = 29,816$  (180,465 person-wave observations). Posterior means for the coefficients and 95% Bayesian credible intervals (CIs). CIs are based on the 2.5th and 97.5th quantiles of the posterior distribution; Bayesian CIs that do not contain zero are **bolded**. HRS = *Health and Retirement Study*. CI = Credible intervals. ADL = Activities of daily living. <sup>a</sup> Estimates multiplied by 100 to reduce leading zeros. <sup>b</sup> Estimates multiplied by 1000 to reduce leading zeros. <sup>c</sup> Transformed by the inverse hyperbole sine. <sup>d</sup> Count of five ADL limitations. <sup>e</sup> Whether provided caregiving to parents (including in-laws) and spouses with self-care and household task items.

Table S5

*Multivariate Multilevel Models Predicting Volunteering and Informal Helping: Gender Interaction*

|                                   | S5-A: Gender × Cohort Interaction |                 |                         |                 | S5-B: Three-way Interaction |                 |                         |                 |
|-----------------------------------|-----------------------------------|-----------------|-------------------------|-----------------|-----------------------------|-----------------|-------------------------|-----------------|
|                                   | <u>Volunteering</u>               |                 | <u>Informal helping</u> |                 | <u>Volunteering</u>         |                 | <u>Informal helping</u> |                 |
|                                   | β                                 | [95% CI]        | β                       | [95% CI]        | β                           | [95% CI]        | β                       | [95% CI]        |
| <b>Fixed effects</b>              |                                   |                 |                         |                 |                             |                 |                         |                 |
| Age linear                        | -0.112                            | [-0.125,-0.090] | -0.118                  | [-0.124,-0.107] | -0.117                      | [-0.140,-0.086] | -0.126                  | [-0.137,-0.114] |
| 10-year cohort                    |                                   |                 |                         |                 |                             |                 |                         |                 |
| 1919-1928                         | 0.374                             | [0.261,0.498]   | 0.346                   | [0.291,0.397]   | 0.382                       | [0.253,0.538]   | 0.388                   | [0.326,0.446]   |
| 1929-1938                         | 0.727                             | [0.630,0.831]   | 0.865                   | [0.811,0.930]   | 0.733                       | [0.627,0.909]   | 0.916                   | [0.866,0.957]   |
| 1939-1948                         | 0.857                             | [0.762,0.979]   | 1.131                   | [1.078,1.186]   | 0.874                       | [0.730,1.032]   | 1.196                   | [1.147,1.239]   |
| 1949-1958                         | 0.944                             | [0.830,1.075]   | 1.204                   | [1.144,1.271]   | 0.949                       | [0.780,1.154]   | 1.257                   | [1.190,1.314]   |
| Female                            | -0.186                            | [-0.303,-0.113] | -0.307                  | [-0.396,-0.217] | -0.183                      | [-0.299,-0.054] | -0.257                  | [-0.295,-0.194] |
| <u>Two-way interactions</u>       |                                   |                 |                         |                 |                             |                 |                         |                 |
| Age linear by cohort interaction  |                                   |                 |                         |                 |                             |                 |                         |                 |
| × 1919-1928                       | 0.039                             | [0.017,0.054]   | 0.011                   | [0.001,0.018]   | 0.040                       | [0.008,0.063]   | 0.015                   | [0.000,0.028]   |
| × 1929-1938                       | 0.097                             | [0.076,0.111]   | 0.052                   | [0.041,0.058]   | 0.106                       | [0.076,0.128]   | 0.064                   | [0.051,0.074]   |
| × 1939-1948                       | 0.115                             | [0.094,0.128]   | 0.077                   | [0.066,0.083]   | 0.121                       | [0.089,0.145]   | 0.093                   | [0.079,0.106]   |
| × 1949-1958                       | 0.091                             | [0.069,0.106]   | 0.090                   | [0.078,0.096]   | 0.099                       | [0.068,0.121]   | 0.103                   | [0.087,0.116]   |
| Age × female                      |                                   |                 |                         |                 | -0.019                      | [-0.032,-0.011] | 0.006                   | [-0.010,0.026]  |
| Female by cohort interaction      |                                   |                 |                         |                 |                             |                 |                         |                 |
| × 1919-1928                       | 0.365                             | [0.255,0.471]   | 0.069                   | [-0.068,0.170]  | 0.379                       | [0.254,0.529]   | 0.038                   | [-0.025,0.105]  |
| × 1929-1938                       | 0.391                             | [0.305,0.541]   | -0.062                  | [-0.162,0.071]  | 0.387                       | [0.230,0.490]   | -0.117                  | [-0.186,-0.045] |
| × 1939-1948                       | 0.343                             | [0.231,0.462]   | -0.090                  | [-0.181,0.001]  | 0.305                       | [0.143,0.459]   | -0.171                  | [-0.250,-0.108] |
| × 1949-1958                       | 0.413                             | [0.311,0.515]   | 0.045                   | [-0.056,0.145]  | 0.415                       | [0.256,0.580]   | -0.002                  | [-0.086,0.052]  |
| <u>Three-way interaction</u>      |                                   |                 |                         |                 |                             |                 |                         |                 |
| Age, female by cohort interaction |                                   |                 |                         |                 |                             |                 |                         |                 |
| × 1919-1928                       |                                   |                 |                         |                 | 0.027                       | [0.013,0.040]   | 0.003                   | [-0.019,0.024]  |
| × 1929-1938                       |                                   |                 |                         |                 | 0.014                       | [0.004,0.027]   | -0.012                  | [-0.031,0.005]  |
| × 1939-1948                       |                                   |                 |                         |                 | 0.019                       | [0.009,0.031]   | -0.016                  | [-0.037,0.001]  |
| × 1949-1958                       |                                   |                 |                         |                 | 0.015                       | [0.005,0.029]   | -0.013                  | [-0.035,0.008]  |

### Selected random effects

|                             |                           |                        |        |                        |                        |                      |       |                      |
|-----------------------------|---------------------------|------------------------|--------|------------------------|------------------------|----------------------|-------|----------------------|
| Intercept                   | 2.778                     | <b>[2.682,2.879]</b>   | 0.971  | <b>[0.944,1.002]</b>   | 2.800                  | <b>[2.697,2.955]</b> | 0.973 | <b>[0.942,1.003]</b> |
| Cov (volunteering, helping) | 0.972                     | <b>[0.935,1.012]</b>   |        |                        | 0.977                  | <b>[0.938,1.023]</b> |       |                      |
| Age                         | 0.0003                    | <b>[0.0001,0.0007]</b> | 0.0004 | <b>[0.0002,0.0007]</b> | 0.001                  | <b>[0.000,0.002]</b> | 0.001 | <b>[0.000,0.001]</b> |
| Cov (volunteering, helping) | >-0.0001 [-0.0001,0.0001] |                        |        |                        | -0.0002 [-0.001,0.000] |                      |       |                      |
| Intercept-slope covariance  | 0.019                     | <b>[0.014,0.025]</b>   | 0.013  | <b>[0.009,0.017]</b>   | 0.019                  | <b>[0.014,0.025]</b> | 0.014 | <b>[0.011,0.018]</b> |

*Notes.* Sample  $N = 29,816$  (180,465 person-wave observations). Posterior means for the coefficients and 95% Bayesian credible intervals (CIs). CIs are based on the 2.5th and 97.5th quantiles of the posterior distribution; Bayesian CIs that do not contain zero are **bolded**. Estimates are for all variables shown in unadjusted model presented in Table 2, including higher-order age terms. HRS = *Health and Retirement Study*. CI = Credible intervals. <sup>a</sup> Estimates multiplied by 100 to reduce leading zeros. <sup>b</sup> Estimates multiplied by 1000 to reduce leading zeros. We note here that, while we find positive and sizable estimates for the interaction terms between gender and cohort membership in Model S5-A, the interaction effects are difficult to interpret because cohorts have different mean ages. In the three-way interaction model (Model S5-B), we found evidence for gender differences in age-cohort trends for volunteering (but not informal helping); however, the size of the estimates and the 95% CIs indicated the gender differences were minor.
